1 **Admixture mapping reveals loci for carcass mass in red deer x sika hybrids in**  
2 **Kintyre, Scotland**

3

4 **Authors:** S. Eryn McFarlane<sup>1,2</sup>, Josephine M. Pemberton<sup>1</sup>

5

6 1. Institute of Evolutionary Biology, School of Biological Sciences, University of  
7 Edinburgh, Edinburgh, UK

8 2. Department of Biology, Lund University, Lund, Sweden

9 \*for correspondence: [eryn.mcfarlane@gmail.com](mailto:eryn.mcfarlane@gmail.com)

10

11 **Abstract (200 words or fewer):**

12 We deployed admixture mapping on a sample of 386 deer from a hybrid swarm  
13 between native red deer (*Cervus elaphus*) and introduced Japanese sika (*Cervus nippon*)  
14 sampled in Kintyre, Scotland to search for Quantitative Trait Loci (QTL) underpinning  
15 phenotypic differences between the species. These two species are highly diverged  
16 genetically ( $F_{st}$  between pure species, based on 50K SNPs, = 0.532) and phenotypically:  
17 pure red have on average twice the carcass mass of pure sika in our sample (38.7kg vs  
18 19.1 kg). After controlling for sex, age and population genetic structure we found ten  
19 autosomal genomic locations with QTL for carcass mass. Effect sizes ranged from 0.191  
20 to 1.839 Kg and as expected, in all cases the allele derived from sika conferred lower  
21 carcass mass. The sika population was fixed for all small carcass mass alleles, whereas  
22 the red deer population was typically polymorphic. GO term analysis of genes lying in  
23 the QTL regions are associated with oxygen transport. Although body mass is a likely  
24 target of selection, none of the SNPs marking QTL are introgressing faster or slower  
25 than expected in either direction.

26

27 **Introduction:**

28 To understand the relationship between genetic variation and phenotypic variation, and  
29 eventually the link between genetic variants and fitness, is a goal of evolutionary  
30 genetics. By understanding the genetic architecture of phenotypic traits, we can then  
31 ask how selection could act on a trait, make predictions of how a trait might change  
32 over time, or how the trait could respond to environmental change (Barton and  
33 Keightley 2002). In the context of hybridization, it is informative to understand the  
34 genetic architecture of the phenotypic traits that differ between hybridizing species.  
35 This is particularly relevant when human influences lead to increased hybridization  
36 (Grabenstein and Taylor 2018) and there is the potential for extinction via  
37 hybridization to decrease biodiversity (Rhymer and Simberloff 1996; Brennan et al.  
38 2015; Todesco et al. 2016).

39

40 Genetic mapping in hybrid zones is particularly powerful because of the  
41 opportunity to use admixture mapping on recombinant individuals (Rieseberg and  
42 Buerkle 2002). The assumption of admixture mapping is that hybrid individuals have  
43 mosaic genomes that have been formed as the result of introgression, selection, and  
44 genetic drift (Buerkle and Lexer 2008; Winkler et al. 2010; Seldin et al. 2011). Coupled  
45 with divergent phenotypes, this allows for quantitative trait locus (QTL) mapping using  
46 fewer markers than are needed for typical genome wide association studies (Rieseberg  
47 and Buerkle 2002). Natural hybrid zones can be extremely powerful for detecting QTLs  
48 because the phenotypes of hybrids are often intermediate, (Buerkle and Lexer 2008).  
49 Admixture mapping is most powerful when both the phenotype and genotypes are  
50 divergent between the two parental populations and when there individuals are  
51 sampled across the ancestry and phenotype spectrum (Buerkle and Lexer 2008).

52

53 Admixture mapping has been used in human populations, wild plants and in  
54 some wild animals, but less so in wild mammals. Specifically, admixture mapping has  
55 been used extensively to find genes for disorders in human populations (Patterson et al.  
56 2004; Smith et al. 2004; Shriner 2013), to search for genes related to reproductive  
57 isolation in *Populus* hybrid zones (Lexer et al. 2007; Lexer et al. 2010), and for  
58 morphological and phytochemical traits in these hybrid zones (Bresadola et al. 2019)  
59 and for traits such as plumage colour, migration behaviour and beak size in birds  
60 (Chaves et al. 2016; Delmore et al. 2016; Brelsford et al. 2017), melanoma and tail fin  
61 morphology in swordtail fish (*Xiphophorus malinche* and *X. birchmanni*) (Powell et al.  
62 2020; Powell et al. 2021), and wing pattern variation in butterflies (Lucas et al. 2018).  
63 In wild mammal systems, admixture mapping has been used to discover 10 genomic  
64 regions for craniofacial shape variation and 23 single nucleotide polymorphisms (SNPs)  
65 associated with leg bone length in mice (*Mus musculus musculus* x *M. m. domesticus*;  
66 (Pallares et al. 2014; Škrabar et al. 2018), and to associate introgressed genomic regions  
67 with body size and skeletal growth in coyotes and wolves (*Canus latrans* and *C. lupus*;  
68 (vonHoldt et al. 2016)). While admixture mapping is suitable for gene mapping in wild  
69 mammals, the best systems would be hybrid swarms with substantial variation in focal  
70 phenotypes.

71

72 Anthropogenic hybridization between red deer (*Cervus elaphus*) and sika (*C.*  
73 *nippon*) in Scotland (Senn et al. 2009, McFarlane et al. 2020), offers an opportunity to  
74 use admixture mapping to identify the genetic architecture of an extremely variable  
75 phenotype, in this case, carcass mass. Briefly, sika were introduced to Scotland in the  
76 19<sup>th</sup> century, and hybrid individuals in Kintyre are common (McFarlane et al. 2020).  
77 Carcass mass of red deer males in Argyll ranges between 55 and 106 kg, while carcass  
78 mass of red deer females ranges from 51-61 kg; by comparison sika in Scotland have an  
79 average carcass mass of 30 kg (males) and 24 kg (females; (Harris and Yalden 2008)  
80 indicating substantial divergence in this trait between the two species. Hybrid  
81 individuals have intermediate phenotypes correlated with their admixture proportion  
82 (Senn et al. 2010). Carcass mass is the weight in kilograms of the animal at death,  
83 following the removal of the head, internal organs, lower legs and blood. Thus, carcass  
84 mass is approximately 60-70% of live mass (Mitchell and Crisp 1981). Red deer and  
85 sika in Scotland are quite genetically diverged, with a genome wide  $F_{st}$  of 0.532 (95%  
86 confidence interval: 0.529 – 0.534 McFarlane et al. 2020a), although it should be noted  
87 that there is substantial variation in divergence across the genome (McFarlane et al.  
88 2021). If there is a SNP for carcass mass that is in a causal region, or in linkage  
89 disequilibrium with a causal region, we should have high power to detect it, based on  
90 the  $F_{st}$  between red deer, the large phenotypic divergence and the estimated number of  
91 generations since admixture began (approximately 6-7; (Crawford and Nielsen 2013;  
92 McFarlane et al. 2020).

93

94 The goals of this study are to use the red-sika hybrid system to 1) identify any  
95 large effect QTL for carcass mass, 2) Inspect the direction of effect of any QTL found,

96 with the prediction that the sika-specific allele will confer lower mass and 3) search for  
97 nearby genes and analyze their putative functions. In general we expect carcass mass in  
98 deer to have a polygenic architecture, as is the case in morphological traits in several  
99 wild systems (e.g. Soay sheep (Bérénos et al. 2015), collared flycatchers and house  
100 sparrows (Silva et al. 2017), and great tits (Santure et al. 2013; Santure et al. 2015).  
101 However, there could also be some large effect QTL, as have been found for human  
102 height (Yang et al. 2010), cattle (Bhuiyan et al. 2018; Roberts 2018; Pegolo et al. 2020),  
103 and such QTL are particularly likely in an admixed population.

104

#### 105 **Methods:**

106 We analyzed 513 deer samples collected from 15 forestry sites in the Kintyre region of  
107 Scotland between 2006 and 2011. The Forestry Commission Scotland (now Forestry  
108 and Land Scotland) culled the deer as part of normal deer control measures, in which  
109 animals were shot as encountered, regardless of phenotype or suspected species (Smith  
110 et al. 2018). Ear tissue samples were stored in 95% ethanol, and animals were sexed,  
111 aged (from tooth eruption and wear) and weighed to the nearest kg within 24 hours of  
112 harvest (Senn and Pemberton 2009). Of the 513 deer sampled and genotyped, carcass  
113 mass was available for 386 animals.

114

#### 115 *DNA extraction and SNP Genotyping*

116 The deer were genotyped on the Cervine Illumina iSelect HD Custom BeadChip, which  
117 has 53,000 attempted SNP assays, using an iScan instrument (Huisman et al. 2016).  
118 When this SNP chip was developed, SNPs were selected to be spaced evenly throughout  
119 the genome based on the bovine genome with which the deer genome has high  
120 homology, although we use the deer linkage map in the present study (Johnston et al.  
121 2017). The majority of SNPs were selected because they were polymorphic in red deer,  
122 specifically those red deer that are part of a long term monitoring project on the Isle of  
123 Rum, but 4500 SNPs were also selected to be diagnostic between either red deer and  
124 sika or red deer and wapiti (*Cervus canadensis*) (Brauning et al. 2015).

125

126 We used the DNeasy Blood and Tissue Kit (Qiagen) according to the manufacturer's  
127 instructions to extract DNA for SNP analysis, with the exception that we eluted twice in  
128 50µl buffer TE to obtain DNA at a sufficiently high concentration. We assayed the  
129 concentration of extractions using the Qubit™ dsDNA BR Assay Kit (Invitrogen). If an  
130 extraction was below 50 ng/µl, it was vacuum-concentrated, re-extracted or omitted  
131 from SNP analysis. Each 96 well plate had a positive control, and genotypes were scored  
132 using the clusters from a previous study (Huisman et al. 2016; McFarlane et al. 2020).

133

134 We followed the same protocol as McFarlane et al. (2020) for quality control, and to  
135 estimate the proportion of red deer ancestry for each individual (Q score). We used  
136 PLINK for all quality control (Purcell et al. 2007). Specifically, we excluded individual  
137 samples with a call rate of less than 0.90, deleted loci with a minor allele frequency of  
138 less than 0.001 and/or a call rate of less than 0.90 (McFarlane et al. 2020), but we did

139 not exclude SNPs based on Hardy Weinberg Equilibrium (HWE) as admixed samples are  
140 not expected to be in HWE. To assign a Q score to each individual we used ADMIXTURE  
141 (Alexander et al. 2009). If the credible interval around the Q score overlapped 0, an  
142 individual was considered pure sika, if the CI overlapped 1 then it was pure red deer  
143 and the individual was considered a hybrid if the CIs overlapped neither 0 or 1  
144 (McFarlane et al. 2020).

145

#### 146 *Admixture mapping*

147 We used Bayesian sparse linear mixed models (BSLMMs) in *gemma* for admixture  
148 mapping (Zhou et al. 2013). BSLMMs model the genetic architecture of traits while  
149 controlling for relatedness, thus giving an estimate of the proportion of phenotypic  
150 variance explained by combined effects of polygenic and large effect SNPs. SNP effects  
151 are drawn from two distributions, one distribution where it is assumed that all SNPs  
152 have a small to negligible effect, and a second distribution where some SNPs are  
153 assumed to have a larger effect drawn from a different distribution (i.e. the sparse  
154 effects; Zhou et al. 2013). BSLMMs include a kinship matrix to account for phenotypic  
155 similarity based on overall relatedness or genetic similarity. Inclusion of this kinship  
156 matrix removes the effect of population structure when determining whether individual  
157 SNPs have a significant effect on the trait (Zhou et al. 2013). From the BSLMM models,  
158 we can extract estimates of the proportion of variance in the phenotype explained (PVE)  
159 by the sparse effects and the random effects, as well as the proportion of the genetic  
160 variance explained (PGE) by the sparse effects. The product of PVE and PGE is the  
161 proportion of phenotypic variance explained by the sparse effects, known as the narrow  
162 sense heritability ( $h^2$ ).

163

164 A BSLMM cannot be run with a covariate matrix, although covariates can be included  
165 as additional SNP effects using the command '--not-snp'. We added covariates to the  
166 input file, specifically a 'bimbam dosage' file output using plink (Purcell et al. 2007;  
167 Bresadola et al. 2019). Because body mass in deer is known to be strongly influenced by  
168 age and sex (Clutton-Brock et al. 1982), we ran the BSLMM including these as additional  
169 covariates. We also included the point estimate of Q score from ADMIXTURE (see  
170 above) as an additional covariate to account for background species differences  
171 (Pallares et al. 2014). We report the results of BSLMMs run both with and without the  
172 covariates. The BSLMM was run for 25 million iterations, with a burnin of 10 million  
173 iterations, and sampled every 1000 iterations after the burnin. Convergence was  
174 confirmed using plots of the MCMC distributions of PVE, PGE, and gamma (i.e. the  
175 number of SNPs included in the sparse distribution), following (Soria-Carrasco 2019).  
176 The model was run three times to ensure that a global peak was found. To determine  
177 significance, we quantified the Posterior Inclusion Probability (PIP), and with a  
178 threshold of 0.1; those SNPs with a PIP higher than 0.1 are considered significantly  
179 associated with the phenotype (Chaves et al. 2016). We report in the main text all SNPs  
180 that we found to be significant in any of the all three runs of the model, and report the  
181 different effect sizes and PIPs from each run in Supplementary Table 1. We report exact

182 estimates of PVE, PGE, and PIPs from the first run of the model (A in Supplementary  
183 Table 1), as all estimates were highly consistent.

184

185 To understand how genotypes for each highlighted SNP were associated with  
186 carcass mass, we used ADMIXTURE to determine the posterior population allele  
187 frequency in the parental red deer and sika populations, and to assign a 'sika' and a 'red  
188 deer' allele(s) (Alexander et al. 2009). We then plotted SNP genotypes for each sex  
189 against carcass mass after accounting for age (Wickham 2011).

190

191

### 192 *Gene Enrichment Analysis*

193 To identify possible genes associated with carcass mass in red deer and sika, we first  
194 quantified the average linkage disequilibrium (LD) across each linkage group in each of  
195 red deer, sika and hybrids (as defined in McFarlane et al. 2020), using PLINK (Purcell et  
196 al. 2007). We used biomaRt (Durinck et al. 2005; Durinck et al. 2009) and ensembl  
197 (Yates et al. 2020) to identify genes 500kb up or downstream of the SNPs of interest,  
198 based on the high LD we expect at this range. We also used biomaRt and ensembl to  
199 infer putative function of these genes in other organisms, specifically cattle and humans.  
200 Finally, we used g:Profiler for functional gene enrichment analysis, searching for  
201 relationships between gene in predefined gene sets, where genes are categorized  
202 together based on biochemical pathways, or consistent co-expression (Subramanian et  
203 al. 2005; Raudvere et al. 2019). We compared the identified genes and associated GO  
204 terms to the databases of each cattle and humans. To account for multiple testing we  
205 used a Benjamini-Hochberg FDR, and examined each biological process (BP), molecular  
206 function (MF) and cellular component (CC) GO terms.

207

208 All data and scripts for this project can be found at  
209 [https://figshare.com/projects/Admixture\\_mapping\\_reveals\\_loci\\_for\\_carcass\\_mass\\_in\\_re  
210 d\\_deer\\_x\\_sika\\_hybrids\\_in\\_Kintyre\\_Scotland/112743](https://figshare.com/projects/Admixture_mapping_reveals_loci_for_carcass_mass_in_red_deer_x_sika_hybrids_in_Kintyre_Scotland/112743).

211

### 212 **Results:**

213 The red deer that we sampled had an average carcass mass of 37.2kg ( $\pm 17.9$ , females,  
214 39.5kg $\pm 24.2$ , males) while the sika weighed 19.4kg $\pm 4.3$  (females, 19.3kg $\pm 9.3$  males),  
215 and hybrid individuals were intermediate at 22.7kg $\pm 16.8$  (females, 27.1kg $\pm 21.5$  males).  
216 The substantial variation within each sex-species is due to variation in age (Figure 1).

217

218 We estimated PVE, which includes sex, age, admixture proportion (Q) and the SNP  
219 effects (including the alpha matrix that included all SNP effects and the sparse matrix  
220 with the additional, large SNP effects) to explain 0.912 (0.87 – 0.95 (credible interval,  
221 CI)) of the phenotypic variance in carcass mass, while PGE, the genetic variance due to  
222 the sparse effects was 0.656 (0.22 -0.99) of . This means that 0.598 (0.19 – 0.94) of the  
223 phenotypic variance was explained by the sparse effects (i.e. those effects due to SNPs  
224 with large effects, PGE/(PVE+PGE+residual)). The sparse effects included sex and age,



225 which both had extremely high PIP (PIPs of 1.00, 0.99 respectively) but not Q, which  
226 had a low PIP (0.0015).

227

228 The mean number of SNPs included in the sparse effects was 58.1 (6-179), but only 10  
229 (11 in run C, Supplementary Table 1) SNPs had a PIP above the threshold of 0.1 (i.e.  
230 these SNPs were included in the sparse effect distribution at least 10% of the time).  
231 These SNPs were on linkage groups 6, 9, 11, 19, 21, 25, 28 and the X chromosome. All  
232 SNPs with a PIP higher than 0.1 were also in the 99.9<sup>th</sup> percentile of effect sizes (Table 1;  
233 Figures 2 & 3), and some are clustered, for example, those on linkage group 19. One SNP  
234 on the X chromosome initially appeared to be associated with carcass mass.  
235 *cela1\_red\_x\_128791597* appeared to have a large effect size, particularly in males, but  
236 this was the result of an extremely low frequency of the minor allele associated with  
237 large carcass mass, since only one male had the relevant allele. For this reason, we  
238 believe that the effect of this SNPs is a sampling artefact, and we do not consider it any  
239 further. All other outlier SNPs had a minor allele frequency (MAF) greater than 0.15  
240 (Table 1).

241

242 To examine whether those alleles associated with small size were more prevalent in  
243 sika, we categorized alleles as sika or red deer alleles, based on posterior estimates of  
244 parental population allele frequencies from ADMIXTURE. For all SNPs significantly  
245 associated with carcass mass, the allele for small carcass mass was fixed or nearly fixed  
246 in sika, and the large carcass mass allele had a high population allele frequency in red  
247 deer (Figure 4, Table 1).

248

249 We found an average, within linkage group, LD of 0.425+/-0.26 in red deer, 0.435 +/-  
250 0.22 in hybrid deer and 0.781+/-0.26 in sika, which varied across linkage groups  
251 (Supplementary Figure 1). From this high LD, we conservatively inferred that genes  
252 within 500Kbp of each of the significant SNPs could be related to carcass mass. We  
253 found 45 unique genes that have been named in the cattle genome (Supplementary  
254 Table 2), and 297 unique GO terms (Supplementary Table 3). We found 15 GO terms  
255 that were significantly associated via gene set analysis based on the genes that we  
256 identified (Table 3; Supplementary Table 4). We found qualitatively similar interactions  
257 when we assessed the GO terms and interactions in humans, although without any  
258 significant GO:BP interactions, and without any three-gene interactions (Supplementary  
259 Table 4).

260

## 261 **Discussion:**

262 Red deer and sika have a substantial phenotypic size difference, while hybrid deer are  
263 intermediate in size (Senn et al. 2010). We have identified 10 autosomal SNPs that are  
264 related to carcass mass, which are associated with seven chromosomes, 45 genes, and  
265 297 GO terms. Our use of an anthropogenic hybrid swarm for admixture mapping has  
266 illuminated potential candidate regions in red deer and sika, which could explain  
267 variation in mass in other deer species, or even other mammalian systems.

268

269 We have identified a number of candidate regions that are associated with carcass mass  
270 in red deer, sika and their hybrids. The 10 autosomal SNPs that we have identified are  
271 all extremely invariant in sika (sika allele frequency > 0.99), but polymorphic in red deer,  
272 as determined by ADMIXTURE (Alexander et al. 2009; McFarlane et al. 2020). In every  
273 case, the allele that was fixed in sika was associated with smaller size (Figure 4).  
274 Additionally, based on substantial LD across each linkage group (Table 2), we identified  
275 40 genes that could be functionally associated with carcass mass in deer (Table S1).  
276 While none of these genes have been associated with carcass mass in white-tailed deer  
277 (Anderson et al. 2020) or cattle (cow QTL database)(Bouwman et al. 2018; Hu et al.  
278 2019), four of them are associated with height in humans (Locke et al. 2015) and 12 are  
279 associated with body mass index (BMI) or obesity in humans (Comuzzie et al. 2012;  
280 Danjou et al. 2015; Winkler et al. 2015; Wojcik et al. 2019). Perhaps the strongest  
281 evidence we have for carcass mass QTL is where multiple adjacent SNPs indicate an  
282 effect. We found multiple SNPs on linkage groups 19 and 25, and in both cases these  
283 SNPs have large effect sizes as well as significant PIPs (Figure 2). We found 25 genes  
284 within 500000bp of the two SNPs identified on linkage group 25, and 6 of these genes  
285 were part of pre-determined gene sets, with associated GO terms (Table 2). Specifically,  
286 HBM, HBA and HBQ1 are all found on linkage group 25 and are associated with oxygen  
287 binding and transport (Table 2). Future functional work could explore if oxygen binding  
288 and transport influence growth in deer.

289

290 It would be interesting to quantify selection on the specific SNPs that we have found  
291 here, to determine the potential for these genomic regions to respond to selection on  
292 body size. We have previously identified SNPs that are introgressing faster than  
293 expected from red deer into sika in our sample (McFarlane et al. 2021), but none of the  
294 SNPs associated with carcass mass are introgressing faster than the genome-wide  
295 expectation, although this doesn't eliminate the possibility of selection for carcass mass  
296 alleles within each population. Ideally, we would measure selection on the phenotypes  
297 of hybrid individuals with a variety of genotypes to make firm statements about  
298 selection on the carcass mass loci we have identified here, and then to make predictions  
299 about the potential for adaptive introgression (Taylor and Larson 2019). However, in  
300 lieu of directly measuring fitness, admixture mapping is one piece of evidence to  
301 identify regions of the genome that are potentially contributing to introgression in  
302 hybrid systems, particularly for traits such as carcass mass which can be assumed to be  
303 under selection. It is because admixture mapping is so inherently powerful that we  
304 were able to identify SNPs explaining a substantial proportion of phenotypic and  
305 genetic variance in a quantitative trait in this wild deer system.

306

307

308 **Acknowledgements:** We would like to thank Cassandre Pyne and Elizabeth Mandeville  
309 for discussions about GEMMA, Lucy Peters for help with gene identification, Forestry  
310 and Land Scotland for sample collection, especially Fraser Robertson and Kevin



311 McKillop. We would also like to thank Helen Senn, Stephanie Smith and Rebecca Holland  
312 for the curation of samples, and for DNA extraction. Samples were genotyped at the  
313 Wellcome Trust Clinical Research Facility Genetics core, and analyses were run on  
314 Edinburgh Compute and Data Facility (ECDF; <http://www.ecdf.ed.ac.uk/>). This work  
315 was funded by a European Research Council Advanced Grant to JMP and a  
316 Vetenskapsrådet (Swedish Research Council) International Postdoc Fellowship to SEM.  
317  
318

319 **Works Cited:**

- 320 Alexander, D. H., J. Novembre, and K. Lange. 2009. Fast model-based estimation of  
321 ancestry in unrelated individuals. *Genome research* 19:1655-1664.
- 322 Anderson, S., S. Côté, J. Richard, and A. Shafer. 2020. Genomic architecture of artificially  
323 and sexually selected traits in a wild cervid. *bioRxiv*:841528.
- 324 Baird, S., N. Barton, and A. Etheridge. 2003. The distribution of surviving blocks of an  
325 ancestral genome. *Theoretical population biology* 64:451-471.
- 326 Barton, N. H. and P. D. Keightley. 2002. Understanding quantitative genetic variation.  
327 *Nature Reviews Genetics* 3:11-21.
- 328 Bhuiyan, M. S., D. Lim, M. Park, S. Lee, Y. Kim, C. Gondro, B. Park, and S. Lee. 2018.  
329 Functional partitioning of genomic variance and genome-wide association study  
330 for carcass traits in Korean Hanwoo cattle using imputed sequence level SNP  
331 data. *Frontiers in genetics* 9:217.
- 332 Bouwman, A. C., H. D. Daetwyler, A. J. Chamberlain, C. H. Ponce, M. Sargolzaei, F. S.  
333 Schenkel, G. Sahana, A. Govignon-Gion, S. Boitard, and M. Dolezal. 2018. Meta-  
334 analysis of genome-wide association studies for cattle stature identifies common  
335 genes that regulate body size in mammals. *Nature genetics* 50:362-367.
- 336 Brauning, R., P. J. Fisher, A. F. McCulloch, R. J. Smithies, J. F. Ward, M. J. Bixley, C. T.  
337 Lawley, S. J. Rowe, and J. C. McEwan. 2015. Utilization of high throughput genome  
338 sequencing technology for large scale single nucleotide polymorphism discovery  
339 in red deer and Canadian elk. *bioRxiv*:027318.
- 340 Brelsford, A., D. P. Toews, and D. E. Irwin. 2017. Admixture mapping in a hybrid zone  
341 reveals loci associated with avian feather coloration. *Proceedings of the Royal*  
342 *Society B: Biological Sciences* 284:20171106.
- 343 Brennan, A. C., G. Woodward, O. Seehausen, V. Muñoz-Fuentes, C. Moritz, A. Guelmami,  
344 R. J. Abbott, and P. Edelaar. 2015. Hybridization due to changing species  
345 distributions: adding problems or solutions to conservation of biodiversity  
346 during global change? *Evolutionary Ecology Research* 16:475-491.
- 347 Bresadola, L., C. Caseys, S. Castiglione, C. A. Buerkle, D. Wegmann, and C. Lexer. 2019.  
348 Admixture mapping in interspecific *Populus* hybrids identifies classes of  
349 genomic architectures for phytochemical, morphological and growth traits. *New*  
350 *Phytologist* 223:2076-2089.
- 351 Buerkle, C. A. and C. Lexer. 2008. Admixture as the basis for genetic mapping. *Trends in*  
352 *Ecology & Evolution* 23:686-694.
- 353 Béréanos, C., P. A. Ellis, J. G. Pilkington, S. H. Lee, J. Gratten, and J. M. Pemberton. 2015.  
354 Heterogeneity of genetic architecture of body size traits in a free - living  
355 population. *Molecular ecology* 24:1810-1830.
- 356 Chaves, J. A., E. A. Cooper, A. P. Hendry, J. Podos, L. F. De León, J. A. Raeymaekers, W. O.  
357 MacMillan, and J. A. C. Uy. 2016. Genomic variation at the tips of the adaptive  
358 radiation of Darwin's finches. *Molecular Ecology* 25:5282-5295.
- 359 Clutton-Brock, T. H., F. E. Guinness, and S. D. Albon. 1982. Red deer: behavior and  
360 ecology of two sexes. University of Chicago press.
- 361 Comuzzie, A. G., S. A. Cole, S. L. Laston, V. S. Voruganti, K. Haack, R. A. Gibbs, and N. F.  
362 Butte. 2012. Novel genetic loci identified for the pathophysiology of childhood  
363 obesity in the Hispanic population. *PloS one* 7:e51954.
- 364 Crawford, J. E. and R. Nielsen. 2013. Detecting adaptive trait loci in nonmodel systems:  
365 divergence or admixture mapping? *Molecular ecology* 22:6131-6148.
- 366 Danjou, F., M. Zoledziewska, C. Sidore, M. Steri, F. Busonero, A. Maschio, A. Mulas, L.  
367 Perseu, S. Barella, and E. Porcu. 2015. Genome-wide association analyses based

- 368 on whole-genome sequencing in Sardinia provide insights into regulation of  
369 hemoglobin levels. *Nature genetics* 47:1264.
- 370 Delmore, K. E., D. P. Toews, R. R. Germain, G. L. Owens, and D. E. Irwin. 2016. The  
371 genetics of seasonal migration and plumage color. *Current Biology* 26:2167-  
372 2173.
- 373 Durinck, S., Y. Moreau, A. Kasprzyk, S. Davis, B. De Moor, A. Brazma, and W. Huber. 2005.  
374 BioMart and Bioconductor: a powerful link between biological databases and  
375 microarray data analysis. *Bioinformatics* 21:3439-3440.
- 376 Durinck, S., P. T. Spellman, E. Birney, and W. Huber. 2009. Mapping identifiers for the  
377 integration of genomic datasets with the R/Bioconductor package biomaRt.  
378 *Nature protocols* 4:1184-1191.
- 379 Grabenstein, K. C. and S. A. Taylor. 2018. Breaking Barriers: Causes, Consequences, and  
380 Experimental Utility of Human-Mediated Hybridization. *Trends in Ecology &*  
381 *Evolution*.
- 382 Harris, S. and D. W. Yalden. 2008. *Mammals of the British Isles: Handbook* 4th Edition
- 383 Hu, Z.-L., C. A. Park, and J. M. Reecy. 2019. Building a livestock genetic and genomic  
384 information knowledgebase through integrative developments of Animal QTLdb  
385 and CorrDB. *Nucleic acids research* 47:D701-D710.
- 386 Huisman, J., L. E. Kruuk, P. A. Ellis, T. Clutton-Brock, and J. M. Pemberton. 2016.  
387 Inbreeding depression across the lifespan in a wild mammal population.  
388 *Proceedings of the National Academy of Sciences* 113:3585-3590.
- 389 Johnston, S. E., J. Huisman, P. A. Ellis, and J. M. Pemberton. 2017. A high-density linkage  
390 map reveals sexually-dimorphic recombination landscapes in red deer (*Cervus*  
391 *elaphus*). *G3: Genes, Genomes, Genetics* 8:2265-2276.
- 392 Lexer, C., C. Buerkle, J. Joseph, B. Heinze, and M. Fay. 2007. Admixture in European  
393 *Populus* hybrid zones makes feasible the mapping of loci that contribute to  
394 reproductive isolation and trait differences. *Heredity* 98:74-84.
- 395 Lexer, C., J. A. Joseph, M. van Loo, T. Barbará, B. Heinze, D. Bartha, S. Castiglione, M. F.  
396 Fay, and C. A. Buerkle. 2010. Genomic admixture analysis in European *Populus*  
397 spp. reveals unexpected patterns of reproductive isolation and mating. *Genetics*  
398 186:699-712.
- 399 Locke, A. E., B. Kahali, S. I. Berndt, A. E. Justice, T. H. Pers, F. R. Day, C. Powell, S.  
400 Vedantam, M. L. Buchkovich, and J. Yang. 2015. Genetic studies of body mass  
401 index yield new insights for obesity biology. *Nature* 518:197-206.
- 402 Lucas, L. K., C. C. Nice, and Z. Gompert. 2018. Genetic constraints on wing pattern  
403 variation in *Lycaeides* butterflies: A case study on mapping complex,  
404 multifaceted traits in structured populations. *Molecular ecology resources*  
405 18:892-907.
- 406 Lynch, M. and B. Walsh. 1998. *Genetics and analysis of quantitative traits*. Sinauer  
407 Sunderland.
- 408 McFarlane, S. E., D. C. Hunter, H. V. Senn, S. L. Smith, R. Holland, J. Huisman, and J. M.  
409 Pemberton. 2020. Increased genetic marker density reveals high levels of  
410 admixture between red deer and introduced Japanese sika in Kintyre, Scotland.  
411 *Evolutionary Applications* 13:432-441.
- 412 McFarlane, S. E., H. V. Senn, S. L. Smith, and J. M. Pemberton. 2021. Locus - specific  
413 introgression in young hybrid swarms: drift may dominate selection. *Molecular*  
414 *Ecology*.

- 415 Mitchell, B. and J. M. Crisp. 1981. Some properties of Red deer (*Cervus elaphus*) at  
416 exceptionally high population - density in Scotland. *Journal of Zoology* 193:157-  
417 169.
- 418 Pallares, L. F., B. Harr, L. M. Turner, and D. Tautz. 2014. Use of a natural hybrid zone for  
419 genomewide association mapping of craniofacial traits in the house mouse.  
420 *Molecular Ecology* 23:5756-5770.
- 421 Patterson, N., N. Hattangadi, B. Lane, K. E. Lohmueller, D. A. Hafler, J. R. Oksenberg, S. L.  
422 Hauser, M. W. Smith, S. J. O'Brien, and D. Altshuler. 2004. Methods for high-  
423 density admixture mapping of disease genes. *The American Journal of Human*  
424 *Genetics* 74:979-1000.
- 425 Pegolo, S., A. Cecchinato, S. Savoia, L. Di Stasio, A. Pauciuolo, A. Brugiapaglia, G. Bittante,  
426 and A. Albera. 2020. Genome-wide association and pathway analysis of carcass  
427 and meat quality traits in Piemontese young bulls. *animal* 14:243-252.
- 428 Powell, D. L., M. García-Olazábal, M. Keegan, P. Reilly, K. Du, A. P. Díaz-Loyo, S. Banerjee,  
429 D. Blakkan, D. Reich, and P. Andolfatto. 2020. Natural hybridization reveals  
430 incompatible alleles that cause melanoma in swordtail fish. *Science* 368:731-736.
- 431 Powell, D. L., C. Payne, S. M. Banerjee, M. Keegan, E. Bashkirova, R. Cui, P. Andolfatto, G.  
432 G. Rosenthal, and M. Schumer. 2021. The Genetic Architecture of Variation in the  
433 Sexually Selected Sword Ornament and Its Evolution in Hybrid Populations.  
434 *Current Biology*.
- 435 Purcell, S., B. Neale, K. Todd-Brown, L. Thomas, M. Ferreira, D. Bender, J. Maller, P. Sklar,  
436 P. de Bakker, M. Daly, and P. Sham. 2007. PLINK: a toolset for whole-genome  
437 association and population-based linkage analysis. *American Journal of Human*  
438 *Genetics* 81.
- 439 Raudvere, U., L. Kolberg, I. Kuzmin, T. Arak, P. Adler, H. Peterson, and J. Vilo. 2019. g:  
440 Profiler: a web server for functional enrichment analysis and conversions of gene  
441 lists (2019 update). *Nucleic acids research* 47:W191-W198.
- 442 Rhymer, J. M. and D. Simberloff. 1996. Extinction by hybridization and introgression.  
443 *Annual Review of Ecology and Systematics*:83-109.
- 444 Rieseberg, L. H. and C. A. Buerkle. 2002. Genetic mapping in hybrid zones. *The American*  
445 *Naturalist* 159:S36-S50.
- 446 Roberts, A. 2018. Genome-wide association study for carcass traits in a composite beef  
447 cattle breed. *Livestock Science* 213:35-43.
- 448 Santure, A. W., I. Cauwer, M. R. Robinson, J. Poissant, B. C. Sheldon, and J. Slate. 2013.  
449 Genomic dissection of variation in clutch size and egg mass in a wild great tit  
450 (*Parus major*) population. *Molecular Ecology* 22:3949-3962.
- 451 Santure, A. W., J. Poissant, I. De Cauwer, K. van Oers, M. R. Robinson, J. L. Quinn, M. A. M.  
452 Groenen, M. E. Visser, B. C. Sheldon, and J. Slate. 2015. Replicated analysis of the  
453 genetic architecture of quantitative traits in two wild great tit populations.  
454 *Molecular Ecology*:n/a-n/a.
- 455 Seldin, M. F., B. Pasaniuc, and A. L. Price. 2011. New approaches to disease mapping in  
456 admixed populations. *Nature Reviews Genetics* 12:523-528.
- 457 Senn, H. V. and J. M. Pemberton. 2009. Variable extent of hybridization between invasive  
458 sika (*Cervus nippon*) and native red deer (*C. elaphus*) in a small geographical  
459 area. *Molecular ecology* 18:862-876.
- 460 Senn, H. V., G. M. Swanson, S. J. Goodman, N. H. Barton, and J. M. Pemberton. 2010.  
461 Phenotypic correlates of hybridisation between red and sika deer (genus  
462 *Cervus*). *Journal of Animal Ecology* 79:414-425.

- 463 Shriner, D. 2013. Overview of admixture mapping. *Current protocols in human genetics*  
464 76:1.23. 21-21.23. 28.
- 465 Silva, C. N. S., S. E. McFarlane, I. J. Hagen, L. Rönnegård, A. M. Billing, T. Kvalnes, P.  
466 Kempainen, B. Rønning, T. H. Ringsby, B. E. Sæther, A. Qvarnström, H. Ellegren,  
467 H. Jensen, and A. Husby. 2017. Insights into the genetic architecture of  
468 morphological traits in two passerine bird species. *Heredity*.
- 469 Smith, M. W., N. Patterson, J. A. Lautenberger, A. L. Truelove, G. J. McDonald, A.  
470 Waliszewska, B. D. Kessing, M. J. Malasky, C. Scafe, and E. Le. 2004. A high-density  
471 admixture map for disease gene discovery in African Americans. *The American*  
472 *Journal of Human Genetics* 74:1001-1013.
- 473 Smith, S. L., H. V. Senn, S. Pérez - Espona, M. T. Wyman, E. Heap, and J. M. Pemberton.  
474 2018. Introgression of exotic *Cervus* (*nippon* and *canadensis*) into red deer  
475 (*Cervus elaphus*) populations in Scotland and the English Lake District. *Ecology*  
476 *and Evolution*.
- 477 Soria-Carrasco, V. 2019. Genetic architecture of traits using multi-locus Genome Wide  
478 Association (GWA) mapping with GEMMA, Sheffield.
- 479 Srikanth, K., S.-H. Lee, K.-Y. Chung, J.-E. Park, G.-W. Jang, M.-R. Park, N. Y. Kim, T.-H. Kim,  
480 H.-H. Chai, and W. C. Park. 2020. A gene-set enrichment and protein-protein  
481 interaction network-based GWAS with regulatory SNPs identifies candidate  
482 genes and pathways associated with carcass traits in Hanwoo cattle. *Genes*  
483 11:316.
- 484 Subramanian, A., P. Tamayo, V. K. Mootha, S. Mukherjee, B. L. Ebert, M. A. Gillette, A.  
485 Paulovich, S. L. Pomeroy, T. R. Golub, and E. S. Lander. 2005. Gene set enrichment  
486 analysis: a knowledge-based approach for interpreting genome-wide expression  
487 profiles. *Proceedings of the National Academy of Sciences* 102:15545-15550.
- 488 Taylor, S. A. and E. L. Larson. 2019. Insights from genomes into the evolutionary  
489 importance and prevalence of hybridization in nature. *Nature ecology &*  
490 *evolution* 3:170-177.
- 491 Todesco, M., M. A. Pascual, G. L. Owens, K. L. Ostevik, B. T. Moyers, S. Hübner, S. M.  
492 Heredia, M. A. Hahn, C. Caseys, and D. G. Bock. 2016. Hybridization and  
493 extinction. *Evolutionary applications* 9:892-908.
- 494 vonHoldt, B. M., R. Kays, J. P. Pollinger, and R. K. Wayne. 2016. Admixture mapping  
495 identifies introgressed genomic regions in North American canids. *Molecular*  
496 *ecology* 25:2443-2453.
- 497 Wickham, H. 2011. *ggplot2*. *Wiley Interdisciplinary Reviews: Computational Statistics*  
498 3:180-185.
- 499 Winkler, C. A., G. W. Nelson, and M. W. Smith. 2010. Admixture mapping comes of age.  
500 *Annual review of genomics and human genetics* 11:65-89.
- 501 Winkler, T. W., A. E. Justice, M. Graff, L. Barata, M. F. Feitosa, S. Chu, J. Czajkowski, T.  
502 Esko, T. Fall, and T. O. Kilpeläinen. 2015. The influence of age and sex on genetic  
503 associations with adult body size and shape: a large-scale genome-wide  
504 interaction study. *PLoS Genet* 11:e1005378.
- 505 Wojcik, G. L., M. Graff, K. K. Nishimura, R. Tao, J. Haessler, C. R. Gignoux, H. M. Highland,  
506 Y. M. Patel, E. P. Sorokin, and C. L. Avery. 2019. Genetic analyses of diverse  
507 populations improves discovery for complex traits. *Nature* 570:514-518.
- 508 Yang, J., B. Benyamin, B. P. McEvoy, S. Gordon, A. K. Henders, D. R. Nyholt, P. A. Madden,  
509 A. C. Heath, N. G. Martin, and G. W. Montgomery. 2010. Common SNPs explain a  
510 large proportion of the heritability for human height. *Nature genetics* 42:565-  
511 569.



512 Yates, A. D., P. Achuthan, W. Akanni, J. Allen, J. Allen, J. Alvarez-Jarreta, M. R. Amode, I. M.  
513 Armean, A. G. Azov, and R. Bennett. 2020. Ensembl 2020. *Nucleic acids research*  
514 48:D682-D688.

515 Zhou, X., P. Carbonetto, and M. Stephens. 2013. Polygenic modeling with Bayesian  
516 sparse linear mixed models. *PLoS Genet* 9:e1003264.

517 Škrabar, N., L. M. Turner, L. F. Pallares, B. Harr, and D. Tautz. 2018. Using the *Mus*  
518 *musculus* hybrid zone to assess covariation and genetic architecture of limb bone  
519 lengths. *Molecular ecology resources* 18:908-921.

520  
521

522 **Figures and Tables:**

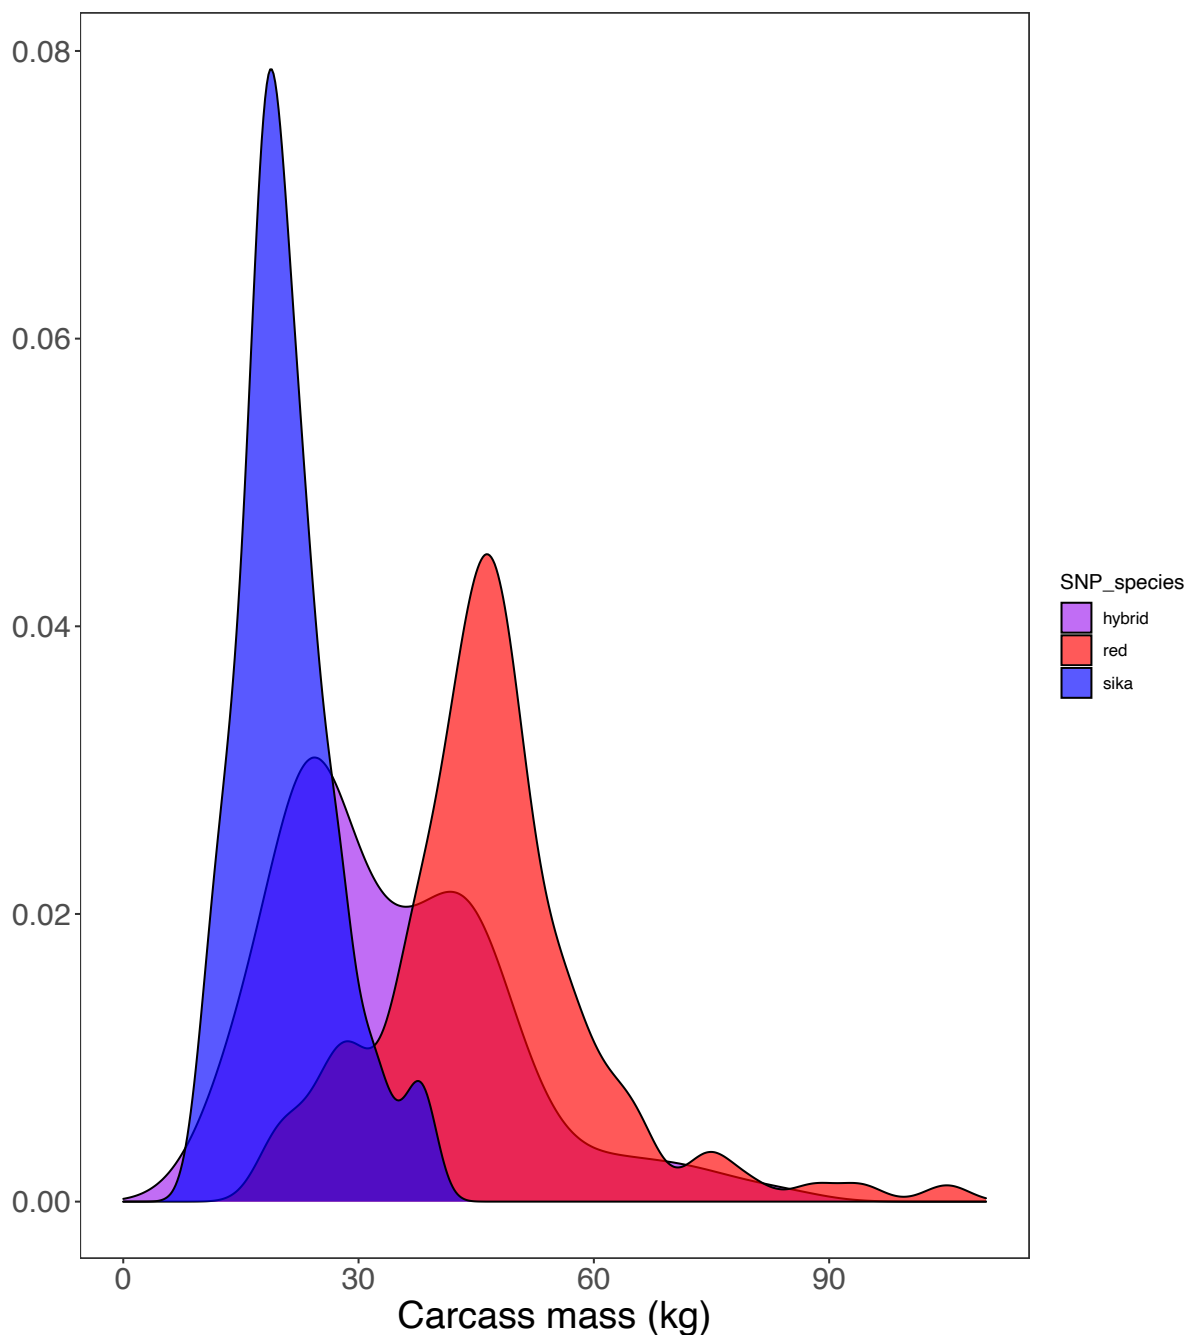

523  
524 Figure 1: Kernel smoothed density plot of red deer (in red), sika (in blue) and hybrids  
525 (in purple) at different carcass mass in kg. Carcass mass is between 60 and 70% of live  
526 mass.  
527

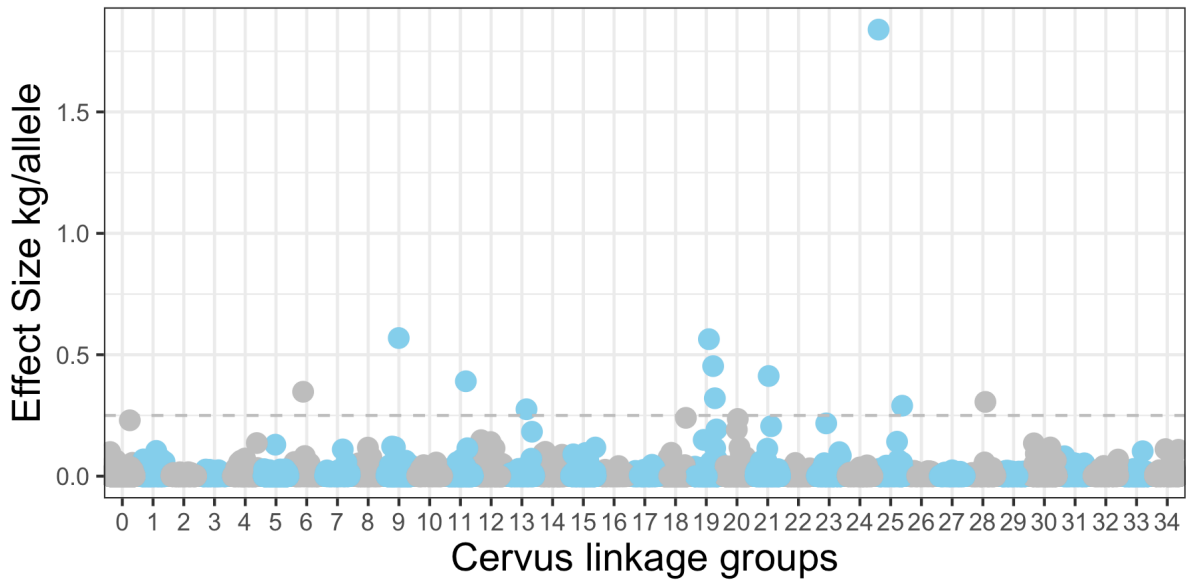

528

529 Figure 2: Effect size for each SNP in the sparse distribution across 34 *Cervus* linkage  
530 groups in an analysis of carcass mass, where group 0 are SNPs that are unmapped and  
531 34 is the X chromosome. Age, sex and Q score were included in this analysis.

532 There is one SNP on the X (chromosome 34, *cela1\_red\_x\_128791597*) that is not on the  
533 plot. This SNP has an extremely high effect size, likely due to the few individuals with  
534 the minor allele (see Table 1).

535

536

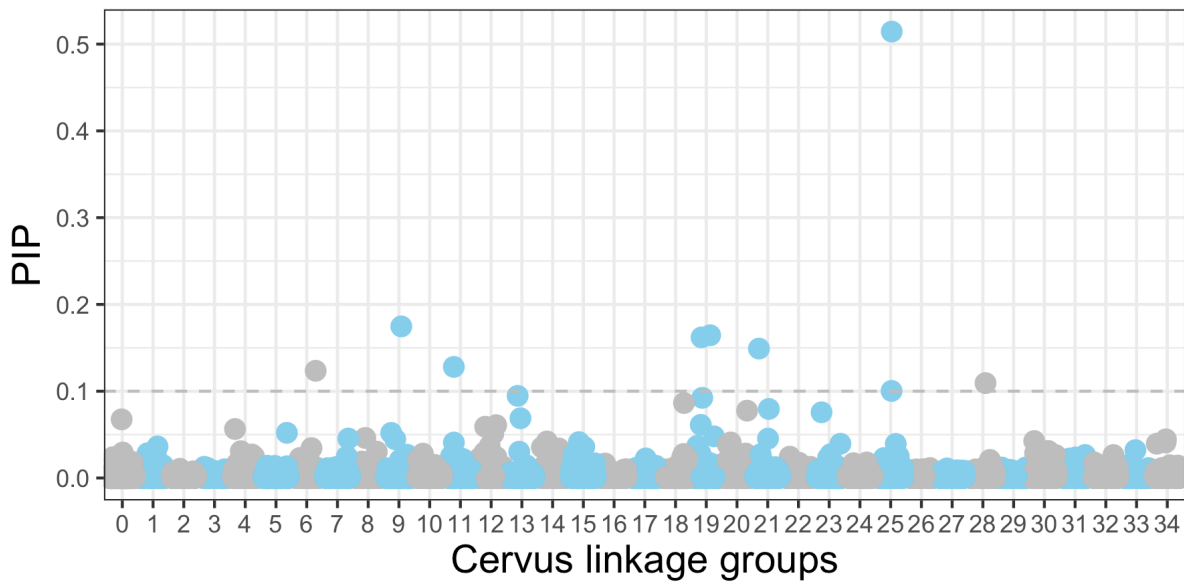

537

538

539

540

541

542

543

544

545

Figure 3: Posterior Inclusion Probability (PIP) in the sparse distribution for each SNP across 34 *Cervus* linkage groups in an analysis of carcass mass, where group 0 are SNPs that are unmapped and 34 is the X chromosome. Age, sex and Q score were included in this analysis. SNPs that were included in the sparse distribution at least 10% of the time (those above the grey dashed line) are considered significant. There is one SNP on the X (chromosome 34, *cela1\_red\_x\_128791597*) that is not on the plot. This SNP has an extremely PIP, likely due to the few individuals with the minor allele (see Table 1).

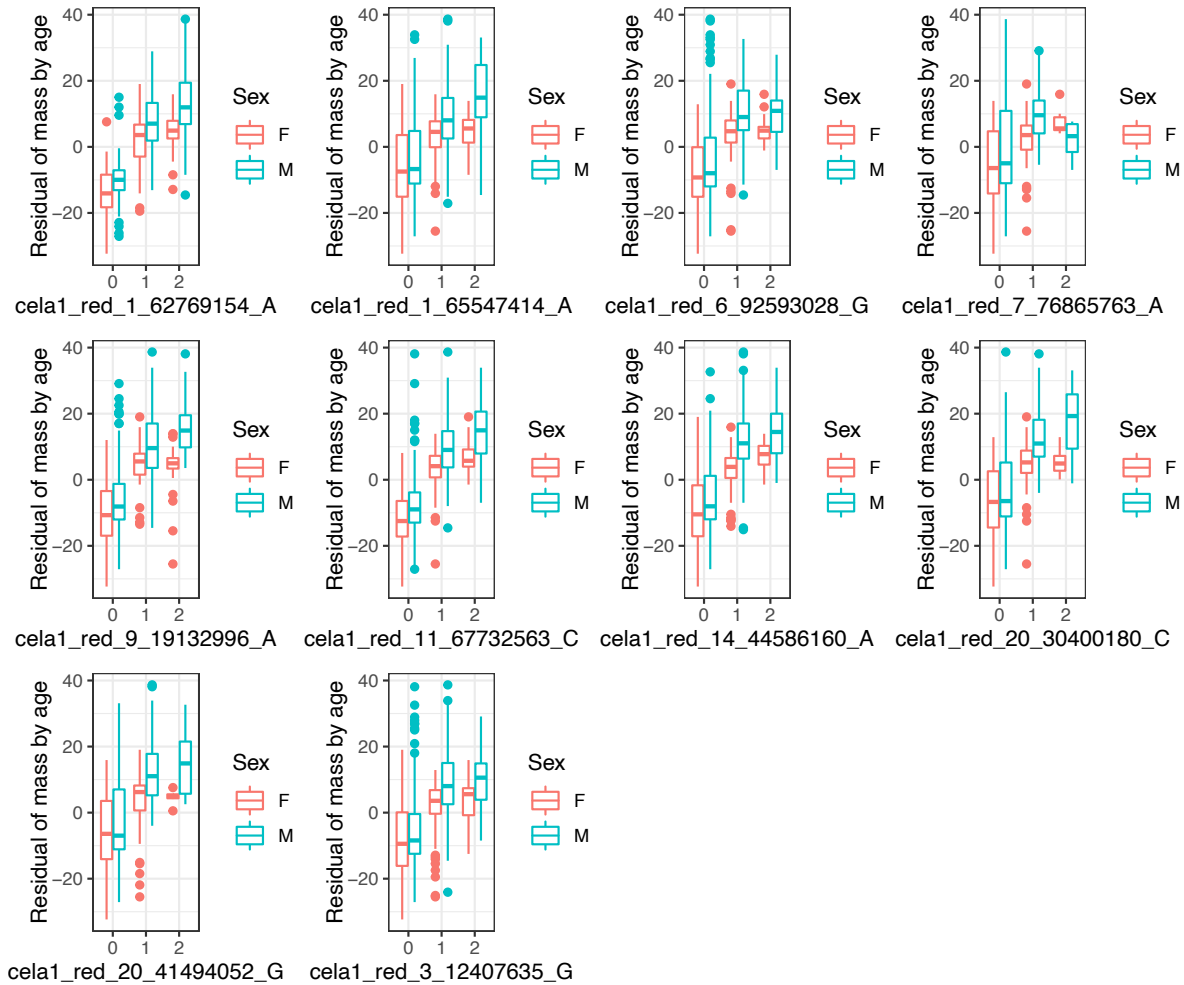

546

547

548 Figure 4: Box and whisker (central line = median, boxes 25%-75%, lines 5% - 95%)  
549 plots illustrating the relationship between the genotypes of each SNP that was included  
550 in the sparse distribution at least 10% of the time and carcass mass of each male and  
551 female deer. The x axis label notes the SNP name. '0' indicates homozygotes for the sika  
552 allele, 1 heterozygotes for the sika allele and a red allele, and 2 homozygotes for the  
553 same red allele. Carcass weights have been regressed against age, and then plotted in  
554 each sex separately. A similar plot of the raw mass (instead of the residual mass) can be  
555 found in the Supplementary material (Supplementary Figure 2).

556



557 Table 1: SNPs that were included in the sparse distribution at least 10% of the time (i.e.  
 558 PIP equal or more than 0.10). One SNP (cela1\_red\_3\_12407635) only had a PIP above  
 559 0.1 in one of the three replicate runs of GEMMA (Supplementary Table 1). We report  
 560 here the effect size (in kgs) and the posterior inclusion probability (PIP). We also note  
 561 the major allele in sika and in red deer, and the allele frequency of these alleles in the  
 562 parental species. While the sika alleles are nearly fixed in sika for these SNPs, red deer  
 563 are polymorphic for nearly all SNPs. Finally, we report the amount (alpha estimate) and  
 564 rate of (beta estimate) introgression (bgc category) for each SNP, as estimated in  
 565 McFarlane et al. 2021.  
 566

| Red deer linkage group | SNP name              | Effect Size | PIP    | Sika Allele | Sika allele Frequency (in sika) | Red deer Allele | Red allele frequency (in red deer) | bgc category                    |
|------------------------|-----------------------|-------------|--------|-------------|---------------------------------|-----------------|------------------------------------|---------------------------------|
| 6                      | cela1_red_6_92593028  | 0.348       | 0.124  | G           | 1.000                           | A               | 0.532                              | not significant not significant |
| 9                      | cela1_red_7_76865763  | 0.569       | 0.175  | A           | 1.000                           | G               | 0.774                              | not significant not significant |
| 11                     | cela1_red_11_67732563 | 0.391       | 0.128  | C           | 0.995                           | C               | 0.613                              | not significant not significant |
| 19                     | cela1_red_1_65547414  | 0.453       | 0.165  | A           | 0.990                           | G               | 0.597                              | not significant not significant |
| 19                     | cela1_red_1_62769154  | 0.564       | 0.162  | A           | 0.990                           | A               | 0.843                              | not significant not significant |
| 20                     | cela1_red_3_12407635  | 0.191       | 0.078* | G           | 0.995                           | G               | 0.504                              | not significant not significant |
| 21                     | cela1_red_14_44586160 | 0.412       | 0.149  | A           | 0.990                           | A               | 0.516                              | not significant not significant |
| 25                     | cela1_red_20_30400180 | 1.839       | 0.515  | C           | 1.000                           | A               | 0.686                              | not significant not significant |
| 25                     | cela1_red_20_41494052 | 0.290       | 0.101  | G           | 1.000                           | A               | 0.673                              | not significant not significant |
| 28                     | cela1_red_9_19132996  | 0.306       | 0.110  | A           | 1.000                           | A               | 0.508                              | not significant not significant |
| X                      | cela1_red_x_128791597 | 3.504       | 0.655  | G           | 1.000                           | A               | 0.943                              | not significant not significant |

567

568

569 Table 2: Identified, significant gene ontology terms that are enriched across genes near  
 570 the SNPs associated with carcass mass in red deer and sika when compared to the cattle  
 571 genome. Possible gene ontology sources are GO:Molecular Function (GO:MF),  
 572 GO:Biological Processes (GO:BP), and GO:Cellular Components (GO:CC). The association  
 573 between the identified genes noted in Gene Interactions and the identified SNPs in this  
 574 study can be found in Supplementary Table 2.

| source | GO Term name                               | GO term_id | Adjusted p_value | -Log10 Pvalue | Intersection size | Gene interactions |
|--------|--------------------------------------------|------------|------------------|---------------|-------------------|-------------------|
| GO:MF  | oxygen carrier activity                    | GO:0005344 | 0.000            | 3.520         | 3                 | HBM,HBA,HBQ1      |
| GO:MF  | oxygen binding                             | GO:0019825 | 0.000            | 3.514         | 3                 | HBM,HBA,HBQ1      |
| GO:MF  | molecular carrier activity                 | GO:0140104 | 0.004            | 2.368         | 3                 | HBM,HBA,HBQ1      |
| GO:MF  | alkylbase DNA N-glycosylase activity       | GO:0003905 | 0.022            | 1.652         | 1                 | MPG               |
| GO:MF  | DNA-3-methyladenine glycosylase activity   | GO:0008725 | 0.022            | 1.652         | 1                 | MPG               |
| GO:MF  | heme binding                               | GO:0020037 | 0.022            | 1.652         | 3                 | HBM,HBA,HBQ1      |
| GO:MF  | DNA-3-methylbase glycosylase activity      | GO:0043733 | 0.022            | 1.652         | 1                 | MPG               |
| GO:MF  | DNA-7-methylguanine glycosylase activity   | GO:0043916 | 0.022            | 1.652         | 1                 | MPG               |
| GO:MF  | tetrapyrrole binding                       | GO:0046906 | 0.022            | 1.652         | 3                 | HBM,HBA,HBQ1      |
| GO:MF  | DNA-7-methyladenine glycosylase activity   | GO:0052821 | 0.022            | 1.652         | 1                 | MPG               |
| GO:MF  | DNA-3-methylguanine glycosylase activity   | GO:0052822 | 0.022            | 1.652         | 1                 | MPG               |
| GO:MF  | 2,4-dienoyl-CoA reductase (NADPH) activity | GO:0008670 | 0.041            | 1.389         | 1                 | DECR2             |
| GO:BP  | gas transport                              | GO:0015669 | 0.001            | 3.008         | 3                 | HBM,HBA,HBQ1      |
| GO:BP  | oxygen transport                           | GO:0015671 | 0.001            | 3.008         | 3                 | HBM,HBA,HBQ1      |
| GO:CC  | hemoglobin complex                         | GO:0005833 | 0.000            | 3.753         | 3                 | HBM,HBA,HBQ1      |

575
